# Supplementary material
Source: PubMed Central journal article supplement (PMC3245576)
Supplement: NIHMS182475-supplement-2.pdf [file NIHMS182475-supplement-2.pdf]

**S4. Optimization of anti-HMW CAR intracellular domain.** Three variations of the anti-HMW CAR extracellular domain were evaluated to determine the optimal format, based on transduction efficiency and cytokine release. Constructs differed in their T cell signaling motifs (28z = CD28 transmembrane / signaling domain and CD3 $\zeta$  signaling domain; 28BBz = CD28 transmembrane / signaling domain, 4-1BB signaling domain and CD3 $\zeta$  signaling domain; CD8.28BBz = CD8 transmembrane domain, CD28 signaling domain, 4-1BB signaling domain and CD3 $\zeta$  signaling domain); all contained the L2H (VL-218-VH) extracellular domain. Values in **bold-face type** are the greatest for that parameter with that donor or the mean of all donors.

|                   | <b>28z</b>                        |                                                    | <b>28BBz</b>                      |                                                    | <b>CD8.28BBz</b>                  |                                                    |
|-------------------|-----------------------------------|----------------------------------------------------|-----------------------------------|----------------------------------------------------|-----------------------------------|----------------------------------------------------|
|                   | <b>% Transduction<sup>1</sup></b> | <b>IFN-<math>\gamma</math> release<sup>2</sup></b> | <b>% Transduction<sup>1</sup></b> | <b>IFN-<math>\gamma</math> release<sup>2</sup></b> | <b>% Transduction<sup>1</sup></b> | <b>IFN-<math>\gamma</math> release<sup>2</sup></b> |
| <b>Donor 1</b>    | <b>48</b>                         | <b>10345</b>                                       | 15                                | 2405                                               | 12                                | 9830                                               |
| <b>Donor 2</b>    | <b>65</b>                         | 3385                                               | 18                                | 2055                                               | 16                                | <b>4355</b>                                        |
| <b>Donor 3</b>    | <b>46</b>                         | 27400                                              | 26                                | 9735                                               | 15                                | <b>31400</b>                                       |
| <b>MEAN (SEM)</b> | <b>53 (6)</b>                     | 13710 (7134)                                       | 20 (3)                            | 4732 (2504)                                        | 14 (1)                            | <b>15195 (8255)</b>                                |

<sup>1</sup> Gene transfer efficiency in human PBL, as determined by flow cytometry on day 9 after transduction.

<sup>2</sup> IFN- $\gamma$  concentration in the supernatant of an overnight coculture between anti-HMW CAR-transduced PBL and the HMW-expressing melanoma line 1300. Values are in pg/mL.
